# Supplementary material for: Co-stimulation of TLR4 and Dectin-1 Induces the Production of Inflammatory Cytokines but not TGF-β for Th17 Cell Differentiation
Source: PubMed Central journal article supplement — Immune Netw. 2014 Feb 21;14(1):30–7. doi: 10.4110/in.2014.14.1.30 (PMC3942505; doi:10.4110/in.2014.14.1.30), 2014-02-21
Supplement: in-14-30-s001.pdf [file in-14-30-s001.pdf]

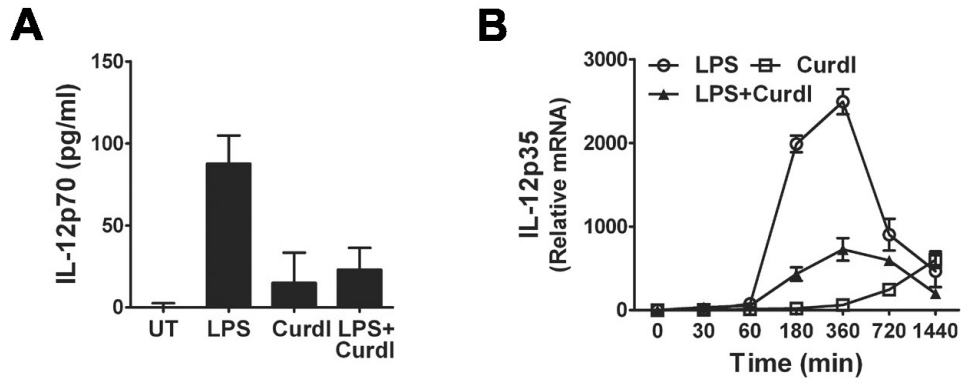

**Figure S1.** IL-12 production was not increased after co-treatment with LPS and curdlan. A and B, BMDC prepared from C57BL/6 mice were stimulated with LPS (1  $\mu$ g/ml), curdlan (100  $\mu$ g/ml), or both. IL-12p70 was measured by ELISA at 24 h (A). mRNA level of IL-12p35 was measured at the indicated time by qRT-PCR (B). \*UT: CM from untreated DC.
