# Supplementary material for: Co-stimulation of TLR4 and Dectin-1 Induces the Production of Inflammatory Cytokines but not TGF-β for Th17 Cell Differentiation
Source: PubMed Central journal article supplement — Immune Netw. 2014 Feb 21;14(1):30–7. doi: 10.4110/in.2014.14.1.30 (PMC3942505; doi:10.4110/in.2014.14.1.30), 2014-02-21
Supplement: in-14-30-s002.pdf [file in-14-30-s002.pdf]

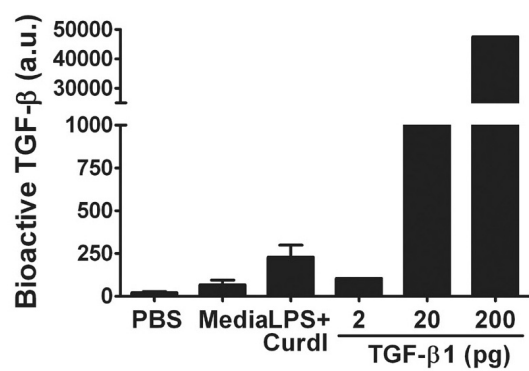

**Figure S2.** DC produce little bioactive TGF- $\beta$ . Bioactive TGF- $\beta$  from the culture supernatants was determined by measuring SEAP activity as described in the Materials and Methods. 2, 20 or 200  $\mu$ g of TGF- $\beta$  1 (Peprotech) was used as a standard.
